# Supplementary material
Source: PubMed Central journal article supplement (PMC6625747)
Supplement: jz9b00340_si_001.pdf [file jz9b00340_si_001.pdf]

# Gd(III)-Gd(III) Relaxation-Induced Dipolar Modulation Enhancement for In-Cell Electron Paramagnetic Resonance Distance Determination

*Mykhailo Azarkh,<sup>§</sup> Anna Bieber,<sup>§¶</sup> Mian Qi,<sup>†</sup> Jörg W. A. Fischer,<sup>§</sup> Maxim Yulikov,<sup>‡</sup> Adelheid Godt,<sup>†</sup>  
Malte Drescher<sup>\*§</sup>*

<sup>§</sup>Department of Chemistry and Konstanz Research School Chemical Biology, University of Konstanz, Universitätsstraße 10, 78457 Konstanz, Germany

<sup>¶</sup>Present address: Department of Molecular Structural Biology, Max Planck Institute of Biochemistry, Am Klopferspitz 18, 82152 Martinsried, Germany

<sup>†</sup>Faculty of Chemistry and Center for Molecular Materials (CM<sub>2</sub>), Bielefeld University, Universitätsstraße 25, 33615 Bielefeld, Germany

<sup>‡</sup>Laboratory of Physical Chemistry, Department of Chemistry and Applied Biosciences, ETH Zurich, Vladimir-Prelog-Weg 2, 8093 Zurich, Switzerland

Corresponding Author

\*E-mail: [malte.drescher@uni-konstanz.de](mailto:malte.drescher@uni-konstanz.de)

## Supporting Information

|                              |   |
|------------------------------|---|
| 1. Experimental details..... | 2 |
| 2. Figure S1.....            | 3 |
| 3. Figure S2.....            | 3 |
| 4. Figure S3.....            | 4 |
| 5. Figure S4.....            | 4 |
| 6. Figure S5.....            | 5 |
| 7. References.....           | 5 |

## Experimental details

### Sample preparation.

The syntheses of Gd-ruler-2.1 and Gd-ruler-3.0 have been reported elsewhere.<sup>1,2</sup> Oocytes from *X. laevis* (stage V/VI) were purchased from EcoCyte Bioscience, Caustrop/Rauxel, Germany. The cell extract from the oocytes was prepared as described previously.<sup>3</sup>

All samples were prepared from aqueous solutions of Gd-rulers. Briefly, a 5 mM solution of Gd-ruler-2.1 in D<sub>2</sub>O (pH ~ 8.0, containing ca. 37 mM NaCl) or a 5 mM solution of Gd-ruler-3.0 in D<sub>2</sub>O (pH ~ 7.0, containing ca. 0.5 mM sodium trifluoroacetate and ca. 30 mM NaCl) was lyophilized. The residual powder was dissolved in a predefined amount of H<sub>2</sub>O (Milli Q).

For in-vitro samples, a 200 μM solution of the Gd-rulers was prepared in a mixture of H<sub>2</sub>O (Milli Q) and glycerol (8:2, v/v).

For the in-extract sample, 1 μl of a 5 mM stock solution of Gd-ruler-3.0 in H<sub>2</sub>O was mixed with 24 μl of cell extract to produce a final concentration of 200 μM. No glycerol was added. The samples were transferred into quartz capillaries 1.6/1.0 mm o.d./i.d. (Bruker Biospin), shock-frozen in liquid nitrogen and stored at -80 °C until further use.

For the in-cell sample, 5 mM stock solution of Gd-ruler-3.0 in H<sub>2</sub>O was microinjected into oocytes (50 nl per oocyte) using a Nanojet II automatic nanoliter injector with fitting micromanipulator MM33 (DRUMMOND) to give a final in-cell concentration of 200 μM. After 2.5 h incubation at room temperature, 30 oocytes loaded with the Gd-ruler were transferred into a quartz tube 3.0/2.0 mm o.d./i.d., shock-frozen in liquid nitrogen and stored at -80 °C until further use.

### EPR spectroscopy

All EPR measurements were performed at Q band on an Eleksys E580 spectrometer equipped with an arbitrary waveform generator (Bruker Biospin) and a 150 W TWT amplifier (Applied Systems Engineering). Temperature control was realized with the cryogen-free system consisting of a helium compressor F-70H (Sumitomo Cryogenics of America), a cryocooler ColdEdge (CE-FLEX-4K-0100, Bruker), and a MercuryITC (Oxford Instruments). A Q-band probehead with access for 3 mm tubes (ER5106QT-2, Bruker) was used for both 1.6 mm and 3 mm (o.d.) sample tubes. All the measurements were performed in the dip of the overcoupled resonator at 34 GHz. Rectangular pulses were used with the lengths fixed at 8 and 16 ns for  $\pi/2$  and  $\pi$ , respectively.

The primary echo decay ( $\pi/2 - \pi - echo$ ) was recorded by increasing the distance between the two microwave pulses with an 8 ns step. The length of the primary echo decay was 15 μs. The inversion recovery ( $\pi - \pi/2 - \pi - echo$ ) was recorded by increasing the distance between the first and the second pulse with a 100 ns step. The length of the inversion recovery was 200 ms. In both experiments, the magnetic field was set to 12207 G, which corresponded to the maximum of the absorption curve.

In the RIDME measurement, a 5-pulse scheme was used and an 8-step phase cycle was applied during the acquisition of the refocused virtual echo.<sup>4</sup> The magnetic field was set to the maximum of the absorption spectrum of Gd-PyMTA label. A time delay between the first and the second pulse was 300 ns, a mixing time was 8  $\mu$ s. The total length of the RIDME dipolar evolution was 2  $\mu$ s, which was acquired with an 8 ns step.

The RIDME time traces were processed with the OvertoneAnalysis software package for Matlab, which includes a modified kernel function to account for overtone harmonics.<sup>5</sup> The background contributions to every RIDME time trace were approximated by a stretched exponential and eliminated by division. The distance distribution was extracted from the resulting form factor by Tikhonov regularization, where the fractions of overtones were fixed at  $P_1 = 0.4$ ,  $P_2 = 0.3$ , and  $P_3 = 0.3$  (for Gd-ruler-3.0) or at  $P_1 = 0.69$ ,  $P_2 = 0.21$ , and  $P_3 = 0.10$  (for Gd-ruler-2.1). Subsequently, the distance distribution at the optimum alpha-value (ranging from 7 to 39) was subjected to the validation. The validation by varying the background start, the modulation depth, and adding white noise at the level 1.2 to give the uncertainty regions for the distance distribution, which were plotted as grey area on top of the distance distribution.<sup>5</sup>

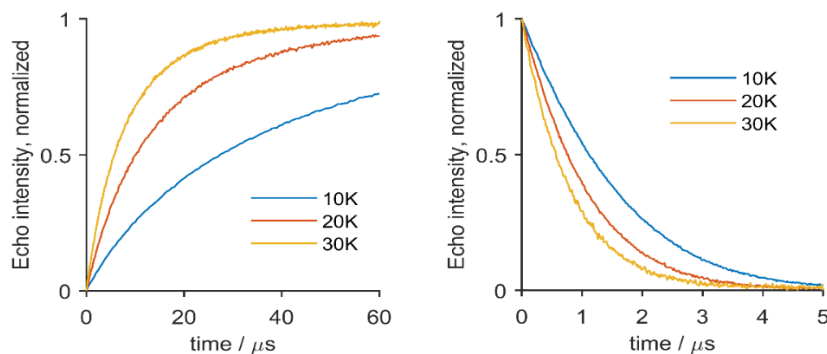

**Figure S1.** Inversion recovery (left) and primary echo decay (right) for Gd-ruler-3.0 in aqueous solution at different temperatures.

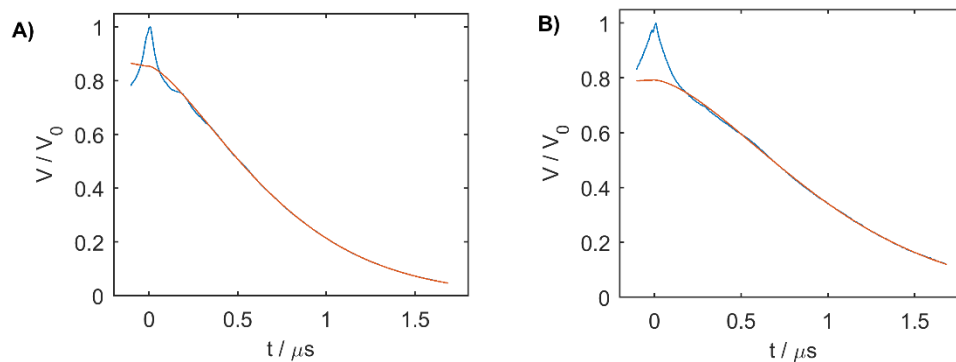

**Figure S2.** RIDME time traces (blue) and the background function (red) for Gd-ruler-2.1 (A) and Gd-ruler-3.0 (B) in frozen aqueous solutions.

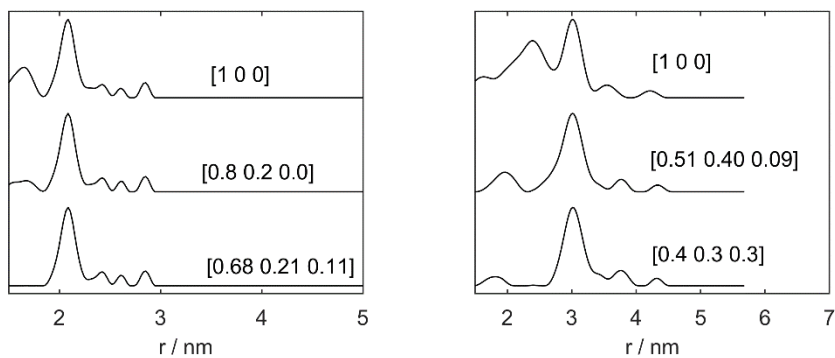

**Figure S3.** Distances Gd-ruler-2.1 (left) and Gd-ruler 3.0 (right) determined for aqueous protonated solutions with different overtone coefficients. From top to bottom: no overtones, overtone coefficients determined in a deuterated aqueous solution, overtone coefficients determined in a protonated aqueous solution.

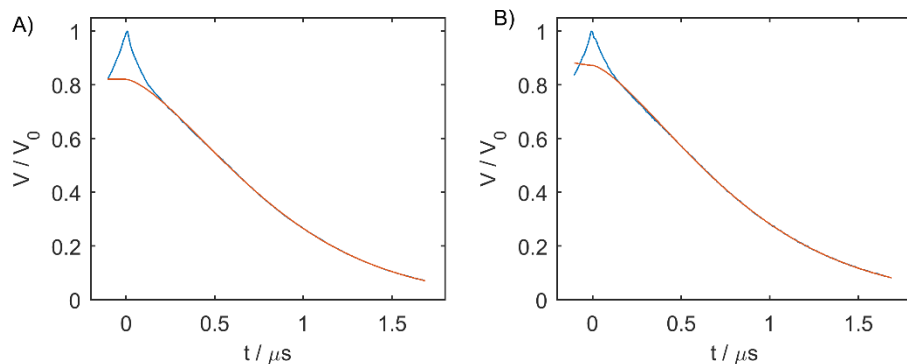

**Figure S4.** RIDME time traces (blue) and the background function (red) for Gd-ruler-3.0 in cell extract (A) and in oocytes (B).

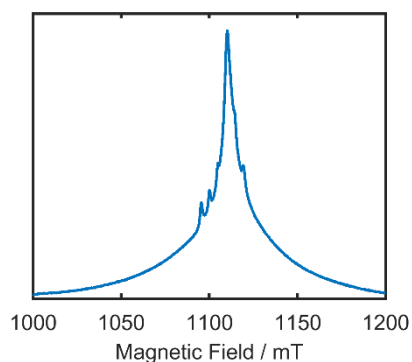

**Figure S5.** Echo-detected field sweep of Gd-ruler-3.0 in oocytes, recorded at 10K.

#### References:

1. Qi, M.; Hülsmann, M.; Godt, A. Spacers for Geometrically Well-Defined Water-Soluble Molecular Rulers and Their Application. *J. Org. Chem.* **2016**, *81*(6), 2549-2571.
2. Clayton, J. A.; Qi, M.; Godt, A.; Goldfarb, D.; Han, S.; Sherwin, M. S. Gd<sup>3+</sup>-Gd<sup>3+</sup> Distances Exceeding 3 nm Determined by Very High Frequency Continuous Wave Electron Paramagnetic Resonance. *Phys. Chem. Chem. Phys.* **2017**, *19*, 5127-5136.

3. Qi, M.; Groß, A.; Jeschke, G.; Godt, A.; Drescher, M. Gd(III)-PyMTA Label Is Suitable for In-Cell EPR. *J. Am. Chem. Soc.* **2014**, *136*, 15366-15378.
4. Milikisyants, S.; Scarpelli, F.; Finiguerra, M. G.; Ubbink, M.; Huber, M. A Pulsed EPR Method to Determine Distances between Paramagnetic Centers with Strong Spectral Anisotropy and Radicals: The Dead-Time Free RIDME Sequence. *J. Magn. Reson.* **2009**, *201*, 48-56.
5. Keller, K.; Mertens, V.; Qi, M.; Nalepa, A. I.; Godt, A.; Savitsky, A.; Jeschke, G.; Yulikov, M. Computing Distance Distributions from Dipolar Evolution Data with Overtones: RIDME Spectroscopy with Gd(III)-based Spin Labels. *Phys. Chem. Chem. Phys.* **2017**, *19*, 17856-17876.
6. Jeschke, G.; Chechik, V.; Ionita, P.; Godt, A.; Zimmermann, H.; Banham, J.; Timmel, C. R.; Hilger, D.; Jung, H. DeerAnalysis2006 – A comprehensive Software Package for Analyzing Pulsed ELDOR Data. *Appl. Magn. Reson.* **2006**, *30* (3-4), 473-498.
